# Supplementary material for: Lymphocyte-to-Monocyte Ratio as a Marker for Endoscopic Activity in Ulcerative Colitis
Source: MDPI journal article supplement (doi:10.3390/immuno1040024), 2021-10-03
Supplement: s1 [file s1]

**Supplementary Material**

**Table S1.** The accuracy of C-reactive protein, lymphocyte to monocyte ratio, and combination of these two markers

| Variable | Sensitivity | Specificity | PPV  | NPV  | Accuracy |
|----------|-------------|-------------|------|------|----------|
| CRP      | 56.7        | 88.1        | 70.8 | 80.0 | 77.5     |
| LMR      | 76.7        | 61.0        | 50.0 | 83.7 | 66.3     |
| CRP+LMR  | 53.3        | 94.9        | 84.2 | 80.0 | 80.9     |

PPV, positive predictive value; NPV, negative predictive value; CRP, C-reactive protein; LMR, lymphocyte-to-monocyte ratio
